# Supplementary material for: Myocardial salvage by succinate dehydrogenase inhibition in ischemia–reperfusion injury depends on diabetes stage in rats
Source: PubMed Central journal article supplement (PMC8192402; doi:10.1007/s11010-021-04108-2), 2021-03-05
Supplement: 11010_2021_4108_MOESM1_ESM.pdf [file 11010_2021_4108_MOESM1_ESM.pdf]

Myocardial salvage by succinate dehydrogenase inhibition in ischemia-reperfusion injury depends on diabetes stage in rats; Molecular and Cellular Biochemistry; Pernille Tilma Tonnesen, Marie Vognstoft Hjortbak, Thomas Ravn Lassen, Jacob Marthinsen Seefeldt, Hans Erik Bøtker, and Nichlas Riise Jespersen; Department of Cardiology, Aarhus University Hospital, Palle Juul-Jensens Boulevard 99, Aarhus, Denmark; [pernille.tilma@clin.au.dk](mailto:pernille.tilma@clin.au.dk)

**Online resource 1. A schematic overview of hemodynamic parameters preischemically, during ischemia and at postischemic reperfusion.**

| Left ventricular developed pressure [mmHg] |                     |   |          |                 |            |                   |                    |                     |
|--------------------------------------------|---------------------|---|----------|-----------------|------------|-------------------|--------------------|---------------------|
| Age/T2DM                                   | Intervention        | n | Baseline | DiMal /no DiMal | Ischemia   | Reperfusion 5 min | Reperfusion 30 min | Reperfusion 100 min |
| <b>6 weeks</b>                             |                     |   |          |                 |            |                   |                    |                     |
| Non-diabetic                               |                     |   |          |                 |            |                   |                    |                     |
|                                            | Control             | 8 | 138 ± 5  | 135 ± 4         | 0.9 ± 0.1  | 12 ± 3            | 73 ± 4             | 59 ± 2              |
|                                            | DiMal 0.1 mM        | 7 | 140 ± 5  | 138 ± 9         | 0.8 ± 0.1  | 8.7 ± 2           | 54 ± 9             | 50 ± 3              |
|                                            | DiMal 0.6 mM        | 7 | 144 ± 6  | 139 ± 5         | 1.1 ± 0.06 | 7.6 ± 4           | 59 ± 7             | 49 ± 6              |
| Prediabetes                                |                     |   |          |                 |            |                   |                    |                     |
|                                            | Control +++         | 8 | 152 ± 5  | 148 ± 6         | 0.9 ± 0.2  | 9.2 ± 3           | 48 ± 6             | 39 ± 6              |
|                                            | DiMal 0.1 mM        | 8 | 148 ± 4  | 141 ± 7         | 1.7 ± 0.3* | 6.4 ± 2           | 47 ± 5             | 39 ± 4              |
|                                            | DiMal 0.6 mM        | 7 | 165 ± 7  | 150 ± 4         | 0.7 ± 0.08 | 11 ± 4            | 42 ± 8             | 39 ± 4              |
| <b>12 weeks</b>                            |                     |   |          |                 |            |                   |                    |                     |
| Non-diabetic                               |                     |   |          |                 |            |                   |                    |                     |
|                                            | Control             | 7 | 150 ± 4  | 157 ± 4         | 1.6 ± 0.3  | 12 ± 4            | 30 ± 10            | 44 ± 4              |
|                                            | DiMal 0.1 mM<br>++  | 8 | 156 ± 6  | 146 ± 5         | 1.6 ± 0.2  | 30 ± 11           | 65 ± 6             | 52 ± 4              |
|                                            | DiMal 0.6 mM        | 7 | 148 ± 7  | 150 ± 7         | 1.1 ± 0.2  | 15 ± 3            | 44 ± 12            | 41 ± 7              |
| Onset diabetes                             |                     |   |          |                 |            |                   |                    |                     |
|                                            | Control             | 7 | 153 ± 23 | 128 ± 24        | 1.1 ± 0.3  | 12 ± 2            | 25 ± 9             | 32 ± 7              |
|                                            | DiMal 0.1 mM<br>++  | 8 | 148 ± 17 | 147 ± 8         | 0.8 ± 0.06 | 16 ± 5            | 61 ± 14            | 55 ± 9              |
|                                            | DiMal 0.6 mM        | 7 | 155 ± 13 | 146 ± 16        | 0.8 ± 0.3  | 12 ± 3            | 23 ± 5             | 24 ± 9              |
| <b>24 weeks</b>                            |                     |   |          |                 |            |                   |                    |                     |
| Non-diabetic                               |                     |   |          |                 |            |                   |                    |                     |
|                                            | Control             | 8 | 143 ± 13 | 136 ± 14        | 0.7 ± 0.1  | 10 ± 2            | 24 ± 7             | 32 ± 8              |
|                                            | DiMal 0.1 mM        | 8 | 174 ± 4  | 162 ± 4         | 0.9 ± 0.07 | 12 ± 4            | 28 ± 8             | 38 ± 6              |
|                                            | DiMal 0.6 mM        | 8 | 152 ± 8  | 152 ± 5         | 0.4 ± 0.1  | 14 ± 3            | 16 ± 6             | 24 ± 6              |
| Mature diabetes                            |                     |   |          |                 |            |                   |                    |                     |
|                                            | Control             | 9 | 160 ± 5  | 162 ± 5         | 0.7 ± 0.05 | 13 ± 2            | 21 ± 5             | 17 ± 7              |
|                                            | DiMal 0.1 mM        | 8 | 144 ± 7  | 128 ± 13        | 0.8 ± 0.09 | 8 ± 1             | 23 ± 5             | 29 ± 4              |
|                                            | DiMal 0.6 mM<br>+++ | 8 | 170 ± 11 | 171 ± 9         | 0.8 ± 0.06 | 17 ± 3            | 42 ± 9             | 46 ± 5              |

| Heart rate [bpm] |              |   |                 |                    |          |                      |                       |                        |
|------------------|--------------|---|-----------------|--------------------|----------|----------------------|-----------------------|------------------------|
| Age/T2DM         | Intervention | n | Baseline        | DiMal<br>/no DiMal | Ischemia | Reperfusion<br>5 min | Reperfusion<br>30 min | Reperfusion<br>100 min |
| <b>6 weeks</b>   |              |   |                 |                    |          |                      |                       |                        |
| Non-diabetic     |              |   |                 |                    |          |                      |                       |                        |
|                  | Control      | 8 | 241 ± 18        | 253 ± 19           | 174 ± 42 | 269 ± 26             | 236 ± 17              | 248 ± 24               |
|                  | DiMal 0.1 mM | 7 | 266 ± 22        | 275 ± 19           | 142 ± 46 | 271 ± 15             | 272 ± 13              | 277 ± 13               |
|                  | DiMal 0.6 mM | 7 | 239 ± 26        | 238 ± 28           | 235 ± 63 | 245 ± 27             | 296 ± 15              | 262 ± 9                |
| Prediabetes      |              |   |                 |                    |          |                      |                       |                        |
|                  | Control      | 8 | 247 ± 13        | 259 ± 14           | 330 ± 58 | 243 ± 18             | 278 ± 11              | 275 ± 12               |
|                  | DiMal 0.1 mM | 8 | 241 ± 23        | 252 ± 16           | 283 ± 19 | 282 ± 12             | 247 ± 16              | 258 ± 16               |
|                  | DiMal 0.6 mM | 7 | 205 ± 25        | 213 ± 24           | 222 ± 62 | 233 ± 27             | 242 ± 11              | 289 ± 24               |
| <b>12 weeks</b>  |              |   |                 |                    |          |                      |                       |                        |
| Non-diabetic     |              |   |                 |                    |          |                      |                       |                        |
|                  | Control      | 7 | 201 ± 32        | 222 ± 16           | 294 ± 54 | 325 ± 40             | 238 ± 28              | 243 ± 14               |
|                  | DiMal 0.1 mM | 8 | 251 ± 9         | 255 ± 7            | 305 ± 13 | 291 ± 26             | 244 ± 24              | 279 ± 13               |
|                  | DiMal 0.6 mM | 7 | 200 ± 14        | 193 ± 18           | 211 ± 47 | 234 ± 19             | 279 ± 35              | 267 ± 19               |
| Onset diabetes   |              |   |                 |                    |          |                      |                       |                        |
|                  | Control      | 7 | 183 ± 38        | 245 ± 45           | 331 ± 64 | 239 ± 24             | 238 ± 43              | 261 ± 45               |
|                  | DiMal 0.1 mM | 8 | 157 ± 31        | 162 ± 13           | 178 ± 39 | 239 ± 20             | 190 ± 30              | 242 ± 32               |
|                  | DiMal 0.6 mM | 7 | 181 ± 14        | 185 ± 25           | 249 ± 60 | 243 ± 23             | 216 ± 17              | 271 ± 25               |
| <b>24 weeks</b>  |              |   |                 |                    |          |                      |                       |                        |
| Non-diabetic     |              |   |                 |                    |          |                      |                       |                        |
|                  | Control      | 8 | 230 ± 15        | 260 ± 31           | 234 ± 50 | 263 ± 23             | 233 ± 17              | 260 ± 19               |
|                  | DiMal 0.1 mM | 8 | 212 ± 16        | 221 ± 16           | 234 ± 36 | 289 ± 27             | 233 ± 18              | 253 ± 18               |
|                  | DiMal 0.6 mM | 8 | 210 ± 7         | 193 ± 12           | 158 ± 55 | 305 ± 30             | 244 ± 19              | 290 ± 15               |
| Mature diabetes  |              |   |                 |                    |          |                      |                       |                        |
|                  | Control      | 9 | 148 ± 13<br>*** | 175 ± 26<br>*      | 289 ± 60 | 179 ± 38             | 187 ± 29              | 244 ± 29               |
|                  | DiMal 0.1 mM | 8 | 150 ± 12        | 194 ± 14           | 231 ± 64 | 185 ± 29             | 218 ± 32              | 190 ± 34               |
|                  | DiMal 0.6 mM | 8 | 124 ± 13        | 124 ± 14           | 219 ± 41 | 186 ± 39             | 134 ± 28              | 235 ± 32               |

| Rate pressure product [mmHg/min] |                    |   |                 |                    |           |                      |                       |                        |
|----------------------------------|--------------------|---|-----------------|--------------------|-----------|----------------------|-----------------------|------------------------|
| Age/T2DM                         | Intervention       | n | Baseline        | DiMal<br>/no DiMal | Ischemia  | Reperfusion<br>5 min | Reperfusion<br>30 min | Reperfusion<br>100 min |
| <b>6 weeks</b>                   |                    |   |                 |                    |           |                      |                       |                        |
| Non-diabetic                     |                    |   |                 |                    |           |                      |                       |                        |
|                                  | Control            | 8 | 33346 ±<br>2847 | 34141 ±<br>2690    | 182 ± 51  | 3315 ± 944           | 17048 ± 1261          | 14476 ±<br>1435        |
|                                  | DiMal 0.1 mM       | 7 | 36846 ±<br>2717 | 37175 ±<br>2166    | 125 ± 56  | 2349 ± 520           | 14844 ± 2669          | 13841<br>± 713         |
|                                  | DiMal 0.6 mM       | 7 | 33877 ±<br>3078 | 32653 ±<br>3291    | 249 ± 69  | 1477 ± 680           | 17128 ± 1605          | 12601 ±<br>1303        |
| Prediabetes                      |                    |   |                 |                    |           |                      |                       |                        |
|                                  | Control†           | 8 | 37460 ±<br>1703 | 38182 ±<br>2026    | 297 ± 67  | 2070 ± 620           | 13042 ± 1441          | 10863 ±<br>1912        |
|                                  | DiMal 0.1 mM       | 8 | 35751 ±<br>3575 | 35253 ±<br>2524    | 509 ± 104 | 1687 ± 538           | 11278 ± 1348          | 9778<br>± 970          |
|                                  | DiMal 0.6 mM       | 7 | 32922 ±<br>2752 | 31712 ±<br>3265    | 162 ± 52  | 2351 ± 730           | 10378 ± 2196          | 10803<br>± 608         |
| <b>12 weeks</b>                  |                    |   |                 |                    |           |                      |                       |                        |
| Non-diabetic                     |                    |   |                 |                    |           |                      |                       |                        |
|                                  | Control            | 7 | 30698 ±<br>4963 | 34591 ±<br>2132    | 497 ± 149 | 3393 ± 1004          | 7608 ± 2629           | 10898 ±<br>1236        |
|                                  | DiMal 0.1 mM<br>++ | 8 | 39120 ±<br>1345 | 37189 ±<br>1402    | 488 ± 54  | 8084 ± 2800          | 16013 ± 2605          | 13960 ±<br>1130        |
|                                  | DiMal 0.6 mM       | 7 | 29406 ±<br>1970 | 28626 ±<br>2368    | 272 ± 87  | 3342 ± 639           | 10926 ± 2586          | 10755 ±<br>1724        |
| Onset diabetes                   |                    |   |                 |                    |           |                      |                       |                        |
|                                  | Control            | 7 | 23003 ±<br>2533 | 25327 ±<br>3625    | 400 ± 99  | 2657 ± 432           | 4338 ± 1162           | 8910 ±<br>2518         |
|                                  | DiMal 0.1 mM       | 8 | 20126 ±<br>2274 | 23954 ±<br>2489    | 147 ± 40  | 3403<br>± 726        | 9420<br>± 2382        | 12358 ±<br>2648        |
|                                  | DiMal 0.6 mM       | 7 | 27505 ±<br>2362 | 24948 ±<br>2019    | 339 ± 106 | 2841 ± 893           | 4575 ± 1020           | 6196 ±<br>2519         |
| <b>24 weeks</b>                  |                    |   |                 |                    |           |                      |                       |                        |
| Non-diabetic                     |                    |   |                 |                    |           |                      |                       |                        |
|                                  | Control            | 8 | 32566 ±<br>3692 | 35652 ±<br>6591    | 158 ± 35  | 2624 ± 851           | 5021 ± 1220           | 8370 ±<br>2050         |
|                                  | DiMal 0.1 mM       | 8 | 36594 ±<br>2312 | 35806 ±<br>2774    | 209 ± 43  | 3117 ± 896           | 6026 ± 1691           | 9385 ±<br>1627         |
|                                  | DiMal 0.6 mM       | 8 | 32223 ±<br>2656 | 29526 ±<br>2207    | 84 ± 28   | 4515 ± 1315          | 3572 ± 1238           | 6960 ±<br>1822         |
| Mature diabetes                  |                    |   |                 |                    |           |                      |                       |                        |
|                                  | Control            | 9 | 23690 ±<br>2350 | 27844 ±<br>3818    | 205 ± 39  | 2175 ± 625           | 2933 ± 567            | 3989 ±<br>2114         |
|                                  | DiMal 0.1 mM       | 8 | 21913 ±<br>2552 | 23972 ±<br>2456    | 199 ± 63  | 1483 ± 351           | 4326 ± 756            | 4886 ± 815             |
|                                  | DiMal 0.6 mM<br>†  | 8 | 20302 ±<br>1664 | 21209 ±<br>2769    | 167 ± 32  | 2947 ± 621           | 4187 ± 732            | 11222 ±<br>2125        |

| Coronary flow [mL/min] |                     |   |          |                    |              |                      |                       |                        |
|------------------------|---------------------|---|----------|--------------------|--------------|----------------------|-----------------------|------------------------|
| Age/T2DM               | Intervention        | n | Baseline | DiMal<br>/no DiMal | Ischemia     | Reperfusion<br>5 min | Reperfusion<br>30 min | Reperfusion<br>100 min |
| <b>6 weeks</b>         |                     |   |          |                    |              |                      |                       |                        |
| Non-diabetic           |                     |   |          |                    |              |                      |                       |                        |
|                        | Control             | 8 | 13 ± 1   | 14 ± 1             | -0.09 ± 0.02 | 12 ± 1               | 13 ± 1                | 10 ± 1                 |
|                        | DiMal 0.1 mM        | 7 | 12 ± 1   | 12 ± 2             | 0.3 ± 0.1    | 11 ± 1               | 11 ± 1                | 7 ± 1                  |
|                        | DiMal 0.6 mM        | 7 | 12 ± 1   | 12 ± 1             | -0.03 ± 0.04 | 10 ± 0.5             | 12 ± 1                | 9 ± 0.9                |
| Prediabetes            |                     |   |          |                    |              |                      |                       |                        |
|                        | Control+++          | 8 | 18 ± 2   | 18 ± 1             | 0.3 ± 0.4    | 15 ± 1               | 17 ± 1                | 15 ± 2                 |
|                        | DiMal 0.1 mM<br>+++ | 8 | 13 ± 2   | 14 ± 2             | 0.09 ± 0.1   | 12 ± 1               | 13 ± 1                | 10 ± 2                 |
|                        | DiMal 0.6 mM<br>+   | 7 | 14 ± 1   | 15 ± 1             | -0.08 ± 0.01 | 13 ± 1               | 14 ± 0.9              | 12 ± 1                 |
| <b>12 weeks</b>        |                     |   |          |                    |              |                      |                       |                        |
| Non-diabetic           |                     |   |          |                    |              |                      |                       |                        |
|                        | Control             | 7 | 20 ± 2   | 19 ± 2             | -0.2 ± 0.2   | 13 ± 2               | 18 ± 1                | 15 ± 1                 |
|                        | DiMal 0.1 mM<br>+   | 8 | 17 ± 1   | 18 ± 1             | -0.04 ± 0.02 | 15 ± 0.7             | 14 ± 1                | 10 ± 0.3               |
|                        | DiMal 0.6 mM        | 7 | 16 ± 1   | 18 ± 1             | 0.2 ± 0.2    | 15 ± 0.7             | 16 ± 0.7              | 13 ± 1                 |
| Onset diabetes         |                     |   |          |                    |              |                      |                       |                        |
|                        | Control             | 7 | 14 ± 0.9 | 15 ± 1             | -0.06 ± 0.03 | 15 ± 0.8             | 15 ± 1                | 11 ± 1                 |
|                        | DiMal 0.1 mM        | 8 | 14 ± 2   | 13 ± 2             | 0.3 ± 0.1    | 14 ± 1               | 14 ± 1                | 11 ± 1                 |
|                        | DiMal 0.6 mM<br>+   | 7 | 19 ± 1   | 20 ± 1             | -0.01 ± 0.06 | 17 ± 0.7             | 18 ± 1                | 14 ± 1                 |
| <b>24 weeks</b>        |                     |   |          |                    |              |                      |                       |                        |
| Non-diabetic           |                     |   |          |                    |              |                      |                       |                        |
|                        | Control             | 8 | 15 ± 1   | 15 ± 0.9           | -0.1 ± 0.05  | 12 ± 2               | 15 ± 1                | 12 ± 0.8               |
|                        | DiMal 0.1 mM        | 8 | 17 ± 1   | 19 ± 1             | 0.003 ± 0.2  | 15 ± 0.8             | 16 ± 0.8              | 11 ± 0.7               |
|                        | DiMal 0.6 mM        | 8 | 15 ± 0.5 | 16 ± 0.6           | -0.3 ± 0.07  | 14 ± 0.6             | 16 ± 0.8              | 12 ± 0.8               |
| Mature diabetes        |                     |   |          |                    |              |                      |                       |                        |
|                        | Control             | 9 | 13 ± 0.9 | 13 ± 0.7           | -0.08 ± 0.05 | 11 ± 0.6             | 12 ± 0.8              | 10 ± 0.6               |
|                        | DiMal 0.1 mM<br>+++ | 8 | 18 ± 2   | 19 ± 3 *           | 0.06 ± 0.2   | 15 ± 2               | 16 ± 2                | 14 ± 2                 |
|                        | DiMal 0.6 mM<br>+   | 8 | 14 ± 0.9 | 14 ± 0.8           | -0.06 ± 0.03 | 13 ± 1               | 16 ± 2                | 14 ± 2                 |

Baseline represents data measured 29 minutes into protocol, DiMal/no DiMal is collected at 39½ minutes, ischemia at 60 minutes and reperfusion is indicated as 5, 30 and 100 minutes from start of reperfusion 80 minutes into protocol. \* p<0.05 \*\*\* p<0.001 as compared to control (one-way ANOVA) + p<0.05 ++ p<0.01 +++ p<0.001 as compared to control (two-way ANOVA on reperfusion measures). Results are mean ± SEM.
