# Supplementary material for: Myocardial salvage by succinate dehydrogenase inhibition in ischemia–reperfusion injury depends on diabetes stage in rats
Source: PubMed Central journal article supplement (PMC8192402; doi:10.1007/s11010-021-04108-2), 2021-03-05
Supplement: 11010_2021_4108_MOESM2_ESM.pdf [file 11010_2021_4108_MOESM2_ESM.pdf]

Myocardial salvage by succinate dehydrogenase inhibition in ischemia-reperfusion injury depends on diabetes stage in rats; Molecular and Cellular Biochemistry; Pernille Tilma Tonnesen, Marie Vognstoft Hjortbak, Thomas Ravn Lassen, Jacob Marthinsen Seefeldt, Hans Erik Bøtker, and Nichlas Riise Jespersen; Department of Cardiology, Aarhus University Hospital, Palle Juul-Jensens Boulevard 99, Aarhus, Denmark; pernille.tilma@clin.au.dk

**Online resource 2. A schematic overview of animal characteristics in the mitochondrial function study (II) at the stages prediabetes (6 weeks), onset diabetes (12 weeks) and mature diabetes (24 weeks).**

| 6 weeks            |               |              |                       |                       |                 |              |                       |                       |
|--------------------|---------------|--------------|-----------------------|-----------------------|-----------------|--------------|-----------------------|-----------------------|
| Type               | Non-diabetic  |              |                       |                       | Prediabetes     |              |                       |                       |
| Group              | SHAM<br>(n=8) | Con<br>(n=8) | DiMal 0.1 mM<br>(n=8) | DiMal 0.6 mM<br>(n=8) | SHAM<br>(n=8)   | Con<br>(n=8) | DiMal 0.1 mM<br>(n=8) | DiMal 0.6 mM<br>(n=8) |
| Bodyweight (BW), g | 154 ± 8       | 159 ± 11     | 181 ± 8               | 150 ± 6               | 182 ± 14        | 219 ± 9 *    | 222 ± 6               | 205 ± 12              |
| B-glucose, mmol/L  | 3.5 ± 0.1     | 3.7 ± 0.3    | 4.4 ± 0.08            | 3.5 ± 0.09            | 4.9 ± 0.1       | 5.4 ± 0.2 *  | 6.0 ± 0.2             | 5.2 ± 0.2             |
| 12 weeks           |               |              |                       |                       |                 |              |                       |                       |
| Type               | Non-diabetic  |              |                       |                       | Onset diabetes  |              |                       |                       |
| Group              | SHAM<br>(n=8) | Con<br>(n=8) | DiMal 0.1 mM<br>(n=8) | DiMal 0.6 mM<br>(n=8) | SHAM<br>(n=8)   | Con<br>(n=8) | DiMal 0.1 mM<br>(n=8) | DiMal 0.6 mM<br>(n=8) |
| Bodyweight (BW), g | 289 ± 6       | 281 ± 15     | 291 ± 11              | 308 ± 8               | 373 ± 6         | 383 ± 4 *    | 350 ± 12              | 368 ± 8               |
| B-glucose, mmol/L  | 3.9 ± 0.08    | 4.2 ± 0.08   | 5.0 ± 0.1             | 4.1 ± 0.09            | 10 ± 1          | 12 ± 1 *     | 11 ± 1                | 10 ± 1                |
| 24 weeks           |               |              |                       |                       |                 |              |                       |                       |
| Type               | Non-diabetic  |              |                       |                       | Mature diabetes |              |                       |                       |
| Group              | SHAM<br>(n=8) | Con<br>(n=8) | DiMal 0.1 mM<br>(n=8) | DiMal 0.6 mM<br>(n=7) | SHAM<br>(n=8)   | Con<br>(n=8) | DiMal 0.1 mM<br>(n=6) | DiMal 0.6 mM<br>(n=8) |
| Bodyweight (BW), g | 413 ± 9       | 398 ± 6      | 400 ± 12              | 423 ± 12              | 408 ± 16        | 370 ± 13     | 375 ± 20              | 392 ± 15              |
| B-glucose, mmol/L  | 4.8 ± 0.09    | 5.0 ± 0.1    | 5.1 ± 0.2             | 4.7 ± 0.1             | 12 ± 1          | 13 ± 1 *     | 25 ± 2 *              | 12 ± 0.9              |

\* p<0.05 compared to control. Results are mean ±SEM.
