# Supplementary material for: Myocardial salvage by succinate dehydrogenase inhibition in ischemia–reperfusion injury depends on diabetes stage in rats
Source: PubMed Central journal article supplement (PMC8192402; doi:10.1007/s11010-021-04108-2), 2021-03-05
Supplement: 11010_2021_4108_MOESM4_ESM.pdf [file 11010_2021_4108_MOESM4_ESM.pdf]

Myocardial salvage by succinate dehydrogenase inhibition in ischemia-reperfusion injury depends on diabetes stage in rats; Molecular and Cellular Biochemistry; Pernille Tilma Tonnesen, Marie Vognstoff Hjortbak, Thomas Ravn Lassen, Jacob Marthinsen Seefeldt, Hans Erik Bøtker, and Nichlas Riise Jespersen; Department of Cardiology, Aarhus University Hospital, Palle Juul-Jensens Boulevard 99, Aarhus, Denmark; pernille.tilma@clin.au.dk

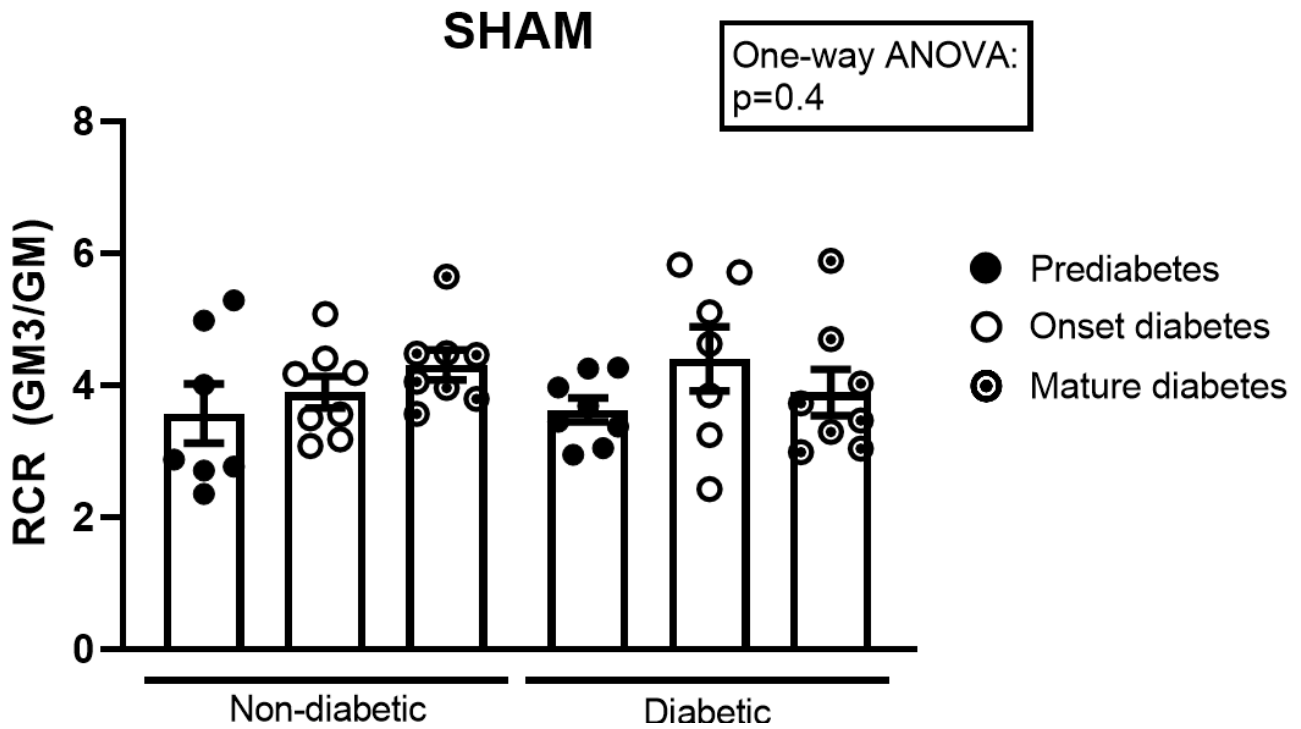

**Online resource 4. Respiratory control ratio (RCR) in SHAM hearts.** RCR is calculated as GM3/GM. Results are mean  $\pm$  SEM.
