# Supplementary material for: Myocardial salvage by succinate dehydrogenase inhibition in ischemia–reperfusion injury depends on diabetes stage in rats
Source: PubMed Central journal article supplement (PMC8192402; doi:10.1007/s11010-021-04108-2), 2021-03-05
Supplement: 11010_2021_4108_MOESM5_ESM.pdf [file 11010_2021_4108_MOESM5_ESM.pdf]

Myocardial salvage by succinate dehydrogenase inhibition in ischemia-reperfusion injury depends on diabetes stage in rats; Molecular and Cellular Biochemistry; Pernille Tilma Tonnesen, Marie Vognstoft Hjortbak, Thomas Ravn Lassen, Jacob Marthinsen Seefeldt, Hans Erik Bøtker, and Nichlas Riise Jespersen; Department of Cardiology, Aarhus University Hospital, Palle Juul-Jensens Boulevard 99, Aarhus, Denmark; [pernille.tilma@clin.au.dk](mailto:pernille.tilma@clin.au.dk)

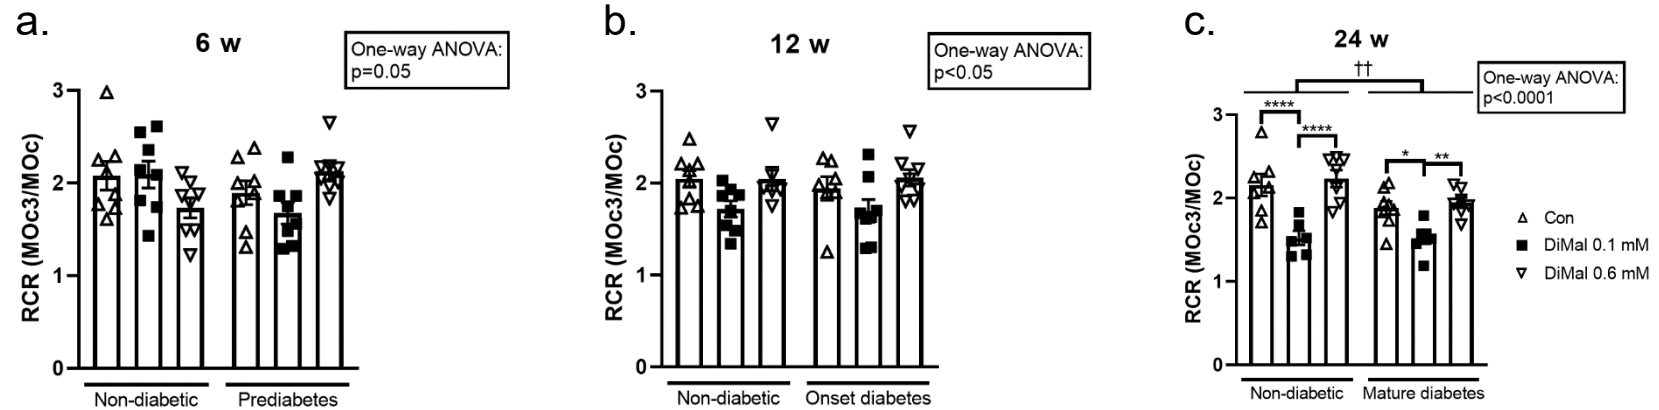

**Online resource 5. Fatty acid oxidation respiratory control ratio (RCR) in non-diabetic and diabetic rats.** (a) Prediabetes and non-diabetic (6 weeks of age). (b) Onset diabetes and non-diabetic (12 weeks of age). (c) Mature diabetes and non-diabetic (24 weeks of age). RCR is calculated as MOC3/MOC.  $\dagger\dagger p<0.01$  (two-way ANOVA). Results are mean  $\pm$  SEM
